# **Title: Is OR “portable” in meta-analysis? Time to consider bivariate generalized linear mixed model.**

Mengli Xiao<sup>a</sup>, Yong Chen<sup>b</sup>, Stephen Cole<sup>c</sup>, Richard MacLehose<sup>d</sup>, David Richardson<sup>c</sup>, Haitao Chu<sup>a,\*</sup>

<sup>a</sup>Division of Biostatistics, School of Public Health, University of Minnesota, Minneapolis, MN 55455, USA

<sup>b</sup>Department of Biostatistics and Epidemiology, University of Pennsylvania, Philadelphia, Pennsylvania 19104, USA

<sup>c</sup>Department of Epidemiology, University of North Carolina, Chapel Hill NC 27599, USA

<sup>d</sup>Division of Epidemiology and Community Health, School of Public Health, University of Minnesota, Minneapolis, MN 55455, USA

\*Correspondence: [chux0051@umn.edu](mailto:chux0051@umn.edu)

## Abstract

**Objectives:** A recent paper by Doi et al. advocated completely replacing the relative risk (RR) with the odds ratio (OR) as the effect measure used to report the association between a treatment and a binary outcome in clinical trials and meta-analyses. Besides some practical advantages of RR over OR and the well-known issue of the OR being non-collapsible, Doi et al.'s key assumption that the OR is “portable” in the meta-analysis, i.e., study-specific ORs are likely not correlated with baseline risks, was not well justified.

**Study designs and settings:** We summarized the Spearman's rank correlation coefficient between study-specific OR and the baseline risk in 40,243 meta-analyses from the Cochrane Database of Systematic Reviews (CDSR).

**Results:** Study-specific ORs are negatively correlated with baseline risk of disease (i.e., higher ORs tend to be observed in studies with lower baseline risks of disease) for most meta-analyses in CDSR. Using a meta-analysis comparing the effect of oral sumatriptan (100 mg) versus placebo on mitigating the acute headache at 2 hours after drug administration, we demonstrate that there is a strong negative correlation between OR (RR or RD) with the baseline risk and the conditional effects notably vary with baseline risks.

**Conclusions:** Replacing RR or RD with OR is currently inadvisable in clinical trials and meta-analyses. It is possible that no effect measure is “portable” in a meta-analysis. In cases where portability of the effect measure is challenging to satisfy, we suggest presenting the conditional effect based on the baseline risk using a bivariate generalized linear mixed model. The bivariate generalized linear mixed model can be used to account for correlation between the effect measure and baseline disease risk. Furthermore, in addition to the overall (or marginal) effect, we recommend that investigators also report the effects conditioning on the baseline risk.

**Keywords:** baseline risk; Cochrane Database of Systematic Reviews (CDSR); correlation; meta-analysis; odds ratio; relative risks

## What is New?

### Key findings

- In most meta-analyses in Cochrane Database of Systematic Reviews, there is notable negative correlation between ORs and baseline risks.
- When such a correlation is not negligible, the OR is not “portable” across studies with different baseline risks.
- When an effect measure is not “portable”, one may derive the effects conditioning on the baseline risk from a bivariate generalized linear mixed model.

### What this study adds to what was known

- The recommendation to replace the RR with the OR in clinical trials and meta-analyses is misguided.
- The OR is not a better effect summary than RR and RD in a single study or in meta-analyses; the noncollapsibility of OR can lead to misleading results in a single study and the OR is generally not portable in the meta-analysis.
- In addition to reporting effect measures such as the OR, RR or RD, it is also important to present the baseline risk.

### What is the implication and what should change now?

- When none of the effects are “portable” in a meta-analysis, in addition to report the overall (or marginal) effect, one should also report the effects conditioning on the baseline risk, regardless of the measure of choice.

## 1. Introduction

We congratulate Doi et al.<sup>1</sup> for their thought-provoking, yet controversial, paper that advocates for the use of the odds ratio (OR) over relative risk (RR) as a measure of effect. They suggest that clinical trials and meta-analyses should use the OR instead of RR as the effect measure for binary outcomes. Doi et al. demonstrate that the magnitude of the RR varies with outcome prevalence. They reached such a conclusion by varying the prevalence of a hypothetical outcome and comparing RRs, while assuming a fixed OR that was treated as the true measure of associations due to its independence with prevalence, (i.e., portability). Although such a recommendation was supported by technically rigorous mathematical derivations, we believe that the call to end the primary use of RR in clinical trials and meta-analyses and to replace the RR by the OR is misguided.

ORs are notoriously difficult to interpret. When people hear “odds” they think of “risks” and this leads to the common misinterpretation of the OR as a RR by scientists and the public, which is a serious concern.<sup>2-7</sup> For example, an OR of 2 is not generally a doubling of risk (if the risk in the control group is 20% and the OR is 2, then the risk in the treated group is 33.3% not 40%). In contrast, the RD and RR offer clearer interpretations. A RD of 0.1 means that the risk of the outcome in the treated group is simply a 10 percentage points higher than the risk of the outcome in the control groups. A RR of 2 means that the risk is doubled in the treatment group compared to the control group. Such a distinction in ease of description has motivated efforts to transform ORs to RRs, or use various regression models to estimate the RR or RD directly.<sup>3,8-12</sup> If RR was fully replaced by OR as Doi et al. recommend, spurious conclusions might become more common because the OR seems to be inevitably interpreted as a RR, and often this will lead people to overestimate the relative effect of a treatment.<sup>2,7,8,13-15</sup> For example, when the risk

is 0.8 in the treatment group and 0.4 in the control group, the corresponding OR=6 and RR=2.

Because the OR = 6 will commonly be misinterpreted as an RR = 6 by the press, clinicians, and other researchers, such an exaggerated treatment effect can be misleading to evidence-based practices.<sup>2,5,7,14,15</sup>

Although Doi et al argue that the variability of the RR (and, by extension, the RD) with baseline prevalence is an impediment to using those measures, we argue the opposite: that the variability of the RR with baseline prevalence is in fact an *appealing* feature in the utility of these measures. The risk of the outcome in the control group affects the clinical meaning of effect measures, as it should.<sup>4,16,17</sup> For example, when the baseline risk is extremely low, say 0.000,001, and the risk after treatment is 0.000,01, the OR and RR, which are both about 10, do not show how rare the outcome is; on the other hand, the RD is 0.000,009 and conveys the small increase in risk. If the baseline risk is high, say 0.96, and the risk is 0.995 for the treatment group, a small effect is expected, which can be reflected by RR and RD (RR=1.04, RD=0.035) rather than the corresponding OR (8.29). Because the OR can drastically overstate the magnitude of effect when the outcome is common and is approximately the same as the RR if the outcome is rare, we do not see a general need for the OR as a default measure of effect. In summary, the interpretation of an effect measure should account for the magnitude of the baseline risk.

In addition to the potential misleading interpretation of the *magnitude* of OR as an effect size measure, numerous studies have discussed the fact that the OR lacks an important and appealing property for interpreting effect estimates, i.e., collapsibility.<sup>18-28</sup> In a single study with a non-confounding stratification variable, if the stratum-specific effects are homogenous, then they are expected to be the same as the crude effect, a desirable property known as collapsibility

of an effect measure. Both RR and RD have this desirable property, while OR does not.<sup>19,24,29</sup>

We will discuss this noncollapsibility issue of OR in details in Section 2.

Furthermore, Doi et al. argued that the OR is a better effect measure of association because OR is likely unassociated with the baseline risk. We believe that a careful discussion is needed about the practicality of, and empirical support for, this assumption. In meta-analyses, differences in the baseline risk across studies may explain the treatment effect heterogeneity.<sup>30-32</sup> Multiple studies suggest that understanding the treatment effect without considering potential variation in treatment effects between groups defined by factors associated with differences in baseline disease risk, is potentially misleading.<sup>31-37</sup> Although Doi et al. showed that the OR was independent of the prevalence by pooling 140,620 trials across 14,960 meta-analyses altogether, it seems counterintuitive that OR is not related to the baseline risk; the analysis did not consider differences in meta-analyses, i.e. stratification by each meta-analysis. Hence, it remains unclear whether a general statement that OR better reflects the effect of interest can be made.

In this paper, we first expand in detail about how noncollapsibility makes OR an undesirable summary measure in Section 2. Then, we evaluate whether the OR is correlated with the baseline risk in meta-analysis in Section 3, i.e., whether OR is portable after the differences between meta-analyses are removed. Specifically, to investigate if the correlation commonly exists, we estimate the Spearman's rank correlation coefficient for each meta-analysis with a large-scale evaluation of the meta-analyses from the Cochrane's Database of Systematic Reviews (CDSR). Then in Section 4, when there is a correlation between the baseline risk and the effect measure (e.g. RR, RD or OR) within a meta-analysis, we recommend a bivariate generalized linear mixed-effects model (BGLMM). A detailed case study is presented to illustrate its implementation.

## 2. Is OR a better summary effect measure than RD and RR in a single study?

Unlike the RD or RR, the OR does not correspond to the proportional changes in average odds in the absence of confounding factors, which is known as the noncollapsibility.<sup>18-21,27,29,38</sup> Consequently, the erroneous assumption that the crude and stratum-specific ORs will be equivalent in the absence of confounding can lead to substantial confusion. Specifically, when the ORs are homogenous across strata, the crude OR can be different from stratum-specific ORs in the absence of confounding. This is not true of the RD or RR which are collapsible in the absence of confounding. Table 1A and Table 1B, adapted from Greenland et al (1999), are examples that demonstrate the collapsibility of RD and RR in contrast to OR's noncollapsibility across the covariate Z. It is important to note that there is no association between Z and X in these tables:  $P(Z=1|X=1) = P(Z=1|X=0) = 0.5$ . Because there is no association between Z and X, we know that Z is not a confounder. In Table 1A, we see that the RD is collapsible in the absence of confounding because its crude value is equal to the constant stratum-specific value, all of which are RD=0.2. This is not true for the OR. The stratum specific ORs are both 2.67 and, despite the fact that there is no confounding, the crude OR is 2.25. Although both the stratum-specific OR and crude OR are correctly calculated, one could falsely assume there is confounding bias from OR from Table 1A. Table 1B further demonstrates that RR can be collapsible; its crude value is equal to stratum-specific values in the absence of confounding.

Such noncollapsibility of OR may undermine the interpretability of a summary measure of association from a randomized controlled trials (RCTs) when considering the treatment effect within a subgroup of the treated. If potential confounders are well-controlled for by

randomization, covariate adjustment is generally not necessary; and, often it is desirable to be able to interpret the crude treatment effect estimate as the stratum-specific effects.<sup>39</sup> In a review of 288 RCT with binary outcomes, 12.4% of them evaluated the primary outcome by the crude OR.<sup>40</sup> One may interpret these crude ORs as the amount the odds of the outcome would change under the intervention in the whole population; however, that same OR does not apply to any specific stratum of the population even if there is no effect modification or confounding. The admitted mathematical niceties of the OR are not reason enough to accept such a confusing state of affairs. Of course, when the outcome is rare, the OR approximates the RR and is, therefore, approximately collapsible.

The noncollapsibility of OR also brings additional difficulties to its conversion into the RR, RD and the number needed to treat (NNT). Contrary to the ease with which Doi et al suggest that other effect measures can be readily-derived from OR, the simple algebraic conversion noted by Doi et al. converting stratum-specific ORs to stratum-specific RR and RD will not yield the crude RR, RD and NNT one might calculate, for example, by classical Mantel-Haenszel methods.<sup>38,41</sup>

### **3. Is OR “portable” with varying baseline risks in meta-analyses?**

Because the values of the aforementioned ORs are highly dependent on the population they are evaluated at, its violation of portability seems inevitable. In fact, effect modification and confounding bias are common in practice such that a direct inference based on estimated measures about external populations, i.e., portability, is hardly satisfied. Doi et al. examined the correlation between ORs and baseline risks in all studies across distinctive meta-analyses and found no correlation. However, they did not examine whether there was a correlation between



ORs and baseline risks within individual meta-analyses, which is a more relevant question. We argue that the true dependence of the OR on the baseline risk may be masked by merging miscellaneous meta-analyses. Without considering the differences between meta-analyses, the conclusion in Doi et al., that no correlation between OR with the baseline from a mixture of distinctive meta-analyses implies portability, is concerning.

We suspect that such an assumption may be easily violated if ORs correlate with baseline risks within the *same* meta-analysis. Hence, we assessed the correlation of the ORs with the baseline risks within each meta-analysis using the Cochrane Database of Systematic Reviews (CDSR), which is updated to January 2020. A total of 40,243 meta-analyses containing at least 3 studies with binary outcomes were included. For studies with zero counts where OR is not defined in the corresponding  $2 \times 2$  table, rather than omitting the studies with the information about rare outcome as in Doi et al., we added 0.5 to all cells of the  $2 \times 2$  table of the studies with at least one zero count as recommended by a recent study.<sup>42</sup> The Spearman's rank correlation coefficient (Spearman's  $\rho$ ) was used to capture both the linear and nonlinear correlation between the OR and the baseline risk for studies in each meta-analysis. To detect whether such correlation changes with the number of studies per meta-analysis, the quantiles of the Spearman's  $\rho$  were summarized, after stratified by number of studies in a meta-analysis. Our summary over CDSR and visualizations were implemented in R (version 3.5.3).

Figure 1 presents the correlation of the OR with the baseline risk with the varying number of studies ( $\geq 3$ ) per meta-analysis. The OR is noticeably correlated with the baseline risk. In nearly half of 40,243 meta-analyses, the absolute values of Spearman's  $\rho$  are larger than 0.5, a threshold corresponding to moderate correlation.<sup>43</sup> Although the portability appears to hold for OR across varying levels of prevalence from the Figure 3 in Doi et al., our results show that the

correlation between the OR and the baseline risk is clearly not negligible in most of the meta-analyses (Figure 1). In fact, those correlations are generally negative; most 75% quantiles of Spearman's  $\rho$  are negative across all number of studies.

## 4. What to do next? Estimating overall and conditional effects from a bivariate generalized linear mixed model (BGLMM)

To account for potential correlation of the baseline risk with a treatment (or exposure) effect measure, meta-regression has been widely used to obtain the effects conditioning on the baseline risk in medical literatures.<sup>30,44,45</sup> However, several pitfalls of a naïve meta-regression have been criticized, because the baseline risk itself is a post-randomization variable rather than a fixed covariate.<sup>46-49</sup> Alternatively, several studies have recommended using generalized linear mixed-effects models (BGLMMs) to jointly model the effect size and the baseline risk.<sup>33,36,50</sup>

### 4.1 The BGLMM

In this section, we describe the BGLMM model and discuss how to obtain the overall (marginal or population average effect) and the effect conditioning on varying baseline risks to account for potential correlation. To be general, we discuss estimation of both marginal and conditional OR, RR and RD from the BGLMM model. Consider a meta-analysis with  $N$  studies, BGLMM will jointly model the underlying event risks from the baseline and treatment (or exposure) group.<sup>51</sup> For the  $i$ th study  $i = 1 \dots, N$ , let  $p_{i0}$  denote the baseline risk, and  $p_{i1}$  the risk in the treatment group. As a result of potential correlation of the study-specific treatment effect with the corresponding baseline risk  $p_{i0}$ , the underlying true baseline and exposure risks  $p_{i0}$  and  $p_{i1}$  may be correlated. They can be jointly modeled by a BGLMM as:

$$g(p_{i0}) = \mu_0 + v_{i0} \text{ and } g(p_{i1}) = \mu_1 + v_{i1}, (v_{i0}, v_{i1})^T \sim N((0,0)^T, \Sigma) \quad (1)$$

Here,  $g(\cdot)$  denotes the link function which transforms the event probabilities to linear forms, and

$\Sigma = \begin{pmatrix} \sigma_0^2 & r\sigma_0\sigma_1 \\ r\sigma_0\sigma_1 & \sigma_1^2 \end{pmatrix}$  denotes the covariance. Although one can apply other link functions, we

choose the most commonly used link function, the logit link. The study-specific treatment effect in the logit scale is therefore expressed as  $\text{logit}(p_{i1}) - \text{logit}(p_{i0})$ , i.e., the  $\log(OR_i)$ . The parameters  $\mu_0$  and  $\mu_1$  are fixed effects and represent the average baseline and treatment risks in the logit scale. The corresponding study-specific parameters  $v_{i0}$  and  $v_{i1}$  are random effects and assumed to follow a bivariate normal distribution with covariance  $\Sigma$ . The parameters  $\sigma_0^2$  and  $\sigma_1^2$  are between-study variances for the baseline and treatment odds,  $\text{logit}(p_{i1})$  and  $\text{logit}(p_{i0})$ . The  $r$  is the correlation between the baseline and treatment risks in the logit scale, such that the covariance is  $r\sigma_0\sigma_1$ . Hence, the variance of the  $\log(OR_i)$  is  $\sigma_1^2 + \sigma_0^2 - 2r\sigma_0\sigma_1$  and its correlation with the baseline risk ( $p_{i0}$ ) in the logit scale  $r_0$  (i.e., baseline log odds) is implied as:

$$r_0 = \frac{\text{cov}(\log(OR_i), \text{logit}(p_{i0}))}{\sqrt{(\text{var}(\log(OR_i))\text{var}(\text{logit}(p_{i0})))}} = \frac{r\sigma_0\sigma_1 + \sigma_1^2}{\sigma_0\sqrt{\sigma_1^2 + \sigma_0^2 - 2r\sigma_0\sigma_1}}$$

#### 4.2 Estimating the marginal effects from the BGLMM

From a BGLMM model with a logit link, the marginal treatment and baseline risks  $p_1$  and  $p_0$  are

estimated by  $\widehat{p}_1 = E(p_{1i}) \approx 1/(1 + \exp(-\frac{\mu_1}{\sqrt{1+c^2\sigma_1^2}}))$  and

$\widehat{p}_0 = E(p_{0i}) \approx 1/(1 + \exp(-\frac{\mu_0}{\sqrt{1+c^2\sigma_0^2}}))$  where  $c = \frac{16\sqrt{3}}{15\pi}$ .<sup>52</sup> Then, the marginal estimate of OR,

RR and RD for any meta-analysis are given by  $\frac{\widehat{p}_1}{1-\widehat{p}_1} / \frac{\widehat{p}_0}{1-\widehat{p}_0}$ ,  $\widehat{p}_1/\widehat{p}_0$ , and  $\widehat{p}_1 - \widehat{p}_0$ .

#### 4.3 Estimating the conditional effects from the BGLMM

Similarly, for any given baseline risk  $p$  in the study  $i$  (for the prediction purpose  $i$  can be any integer greater than  $N$  in the mixed-effect model), we can obtain the conditional effect

estimate based on the conditional mean of the treatment risk  $E(p_{1i}|p_{0i} = p)$ . According to the bivariate normality assumption between the  $v_{i0}$  and  $v_{i1}$ , the conditional mean of treatment risk  $p_1$  in the logit scale is given by:

$$E(\text{logit}(p_{1i}) | p_{0i} = p) = \mu_1 - \frac{\mu_0 r_0 \sigma_1}{\sigma_0} + \frac{r_0 \sigma_1}{\sigma_0} \text{logit}(p) \quad (2)$$

Because the expression to solve for  $E(p_{1i}|p_{0i} = p)$  from equation (2) is complex and the median is more robust to skewed distribution than the mean, we follow previous studies and use the median as an estimate of  $p_{1i}$  conditioned on  $p_{0i} = p$ .<sup>53</sup> The conditional median of  $p_{1i}$ , i.e.,  $M(p_{1i}|p_{0i} = p)$ , is given by:

$$M(p_{1i}|p_{0i} = p) = \frac{e^{\mu_1 - \frac{\mu_0 r_0 \sigma_1}{\sigma_0} + \frac{r_0 \sigma_1}{\sigma_0} \text{logit}(p)}}{1 + e^{\mu_1 - \frac{\mu_0 r_0 \sigma_1}{\sigma_0} + \frac{r_0 \sigma_1}{\sigma_0} \text{logit}(p)}} \quad (3)$$

Therefore, the conditional estimate of OR, RD, RR are  $\frac{M(p_{1i}|p_{0i}=p)}{1-M(p_{1i}|p_{0i}=p)} / \frac{p}{1-p}$ ,  $M(p_{1i}|p_{0i} = p) - p$  and  $M(p_{1i}|p_{0i} = p)/p$ , respectively. With all the estimates of fixed-effect parameters, between-study variances, and correlation coefficients from (1), the 95% prediction intervals and confidence intervals (CI) for both the marginal and conditional OR, RD, and RR can be obtained through the delta method and normal approximation.

#### 4.4 A case study illustrating the implementation of the BGLMM

As a case study illustrating how to implement BGLMM, we reanalyzed a meta-analysis with 20 studies on comparing the effect of oral sumatriptan (100 mg) versus placebo on mitigating the acute headache at 2 hours after drug administration from the CDSR.<sup>54</sup> We used PROC NLMIXED in SAS (version 9.4) to fit the BGLMM. The random effects were approximately integrated by the default adaptive Gaussian quadrature, and likelihood maximization used the default dual quasi-Newton optimization algorithm. We also compared the marginal effects estimated from the BGLMM with the overall OR, RR and RD estimated from a

standard two-step random-effects meta-analysis without considering correlation as implemented by the `rma` command in R package “metafor”.<sup>55</sup> The Spearman’s  $\rho$  was calculated based on the sample data for each effect summary measure and the corresponding 95% confidence intervals were obtained from Fisher’s  $z$ -transformation with the variance of  $z$  estimated by  $\frac{1+\rho^2}{n-3}$ .<sup>56</sup>

The Spearman’s  $\rho$  for all effect measures versus baseline risks are all nonzero. In particular, the Spearman’s  $\rho$  correlation estimates between the baseline risk and OR, RR and RD are  $-0.74$  (95% CI,  $-0.90$  to  $-0.39$ ),  $-0.90$  (95% CI,  $-0.97$  to  $-0.71$ ) and  $-0.54$  (95%,  $-0.81$  to  $-0.10$ ), respectively. Thus, we fitted the logit BGLMM and Figure 2 shows that the observed OR, RR, RD matched well with the BGLMM. The model obtained an overall (or marginal) OR of 3.48 with 95% CI (2.93 to 4.14), RR (2.05; 95% CI, 1.80 to 2.30) and RD (0.30; 95% CI, 0.26 to 0.33) which are very similar to the OR (3.50; 95% CI, 2.94 to 4.16), RR (2.02; 95% CI, 1.79 to 2.27), and RD (0.29; 95% CI, 0.26 to 0.33) estimated from the two-step random-effect meta-analysis ignoring the correlation.

As shown in Figure 2a, the OR is not stable as the baseline risk changes. The OR estimate from the BGLMM decreases from 6.73 to 2.56 when the baseline risk increases from 0.10 to 0.43 (Figure 2a). The conditional RR and RD obtained from the BGLMM show similar trends, although the pattern is less obvious for the conditional RD (Figure 2b and 2c). Furthermore, the estimated correlation  $\hat{r}_0$  between the log OR and the log baseline odds from the BGLMM is  $-0.68$  (95% CI,  $-0.91$  to  $-0.14$ ), which strengthens the evidence that there is a significant correlation between the treatment effect and the baseline risk. Combined with the fact that most of the observed OR (or RR and RD) as in Figure 2a (or Figure 2b and 2c) are within the 95% prediction interval by BGLMM, it is clear that the correlations between the effect measures and baseline risks are not negligible.

## **5. Discussion**

Because of the interpretability issues and lack of collapsibility, we urge researchers to avoid ORs when either the RD or RR is available. Furthermore, through a systematic evaluation of the CDSR and a real-world meta-analysis example, our results suggest that the value of OR depends on the baseline risk when the differences between meta-analyses are considered. Not only may the baseline risk of the outcome be correlated with the corresponding effect measure in the meta-analysis, but it also dictates the meaningfulness of those effect measures for a single study. This dependency underscores the importance to report the baseline measure for a correct effect interpretation. The assumption that OR is likely “portable”, which seems to be the main reason why Doi et al prefer OR over RR, is easily violated when the OR correlates with the risk in the control group within the same meta-analysis. In summary, the recommendation of replacing RR with OR appears misguided.

Even if the OR is not correlated with the baseline risk in a meta-analysis, only relying on a single aspect to replace one measure with the other is near-sighted; other issues such as interpretability and collapsibility ought to impact the choice of effect measure. Rather than attempting to set one method aside when the correlation with the baseline risk is of concern, perhaps a more meaningful step is to include the baseline risk and report the variation in the effect measure with baseline risks in addition to the marginal effect, regardless of the measure of choice.

## **Acknowledgements and Funding**

The authors gratefully acknowledge the NIH National Library of Medicine (R01LM012982).

## Reference

1. Doi SA, Furuya-Kanamori L, Xu C, Lin L, Chivese T, Thalib L. Questionable Utility of the Relative Risk in Clinical Research: A Call for Change to Practice. *JOURNAL OF CLINICAL EPIDEMIOLOGY*. 2020;in press.
2. Schwartz LM, Woloshin S, Welch HG. Misunderstandings About the Effects of Race and Sex on Physicians' Referrals for Cardiac Catheterization. *THE NEW ENGLAND JOURNAL OF MEDICINE*. 1999;341(4):279-283.
3. Grant RL. Converting an Odds Ratio to a Range of Plausible Relative Risks for Better Communication of Research Findings. *BMJ : BRITISH MEDICAL JOURNAL*. 2014;348(jan24 1):f7450-f7450.
4. Sinclair JC, Bracken MB. Clinically Useful Measures of Effect in Binary Analyses of Randomized Trials. *JOURNAL OF CLINICAL EPIDEMIOLOGY*. 1994;47(8):881-889.
5. Sainani KL, Schmajuk G, Liu V. A Caution on Interpreting Odds Ratios. *SLEEP*. 2009;32(8):976-976.
6. Newcombe RG. A Deficiency of the Odds Ratio as a Measure of Effect Size. *STATISTICS IN MEDICINE*. 2006;25(24):4235-4240.
7. Chen H, Cohen P, Chen S. How Big Is a Big Odds Ratio? Interpreting the Magnitudes of Odds Ratios in Epidemiological Studies. *COMMUNICATIONS IN STATISTICS—SIMULATION AND COMPUTATION®*. 2010;39(4):860-864.
8. McNutt LA. Estimating the Relative Risk in Cohort Studies and Clinical Trials of Common Outcomes. *AMERICAN JOURNAL OF EPIDEMIOLOGY*. 2003;157(10):940-943.
9. Zhang J, Yu KF. What's the Relative Risk? A Method of Correcting the Odds Ratio in Cohort Studies of Common Outcomes. *JAMA*. 1998;280(19):1690-1691.
10. Chu H, Cole SR. Estimation of Risk Ratios in Cohort Studies with Common Outcomes: "A Bayesian Approach". *EPIDEMIOLOGY*. 2010:855-862.
11. Skove T, Deddens J, Petersen MR, Endahl L. Prevalence Proportion Ratios: Estimation and Hypothesis Testing. *INTERNATIONAL JOURNAL OF EPIDEMIOLOGY*. 1998;27(1):91-95.
12. Wacholder S. Binomial Regression in Glim: Estimating Risk Ratios and Risk Differences. *AMERICAN JOURNAL OF EPIDEMIOLOGY*. 1986;123(1):174-184.
13. Deeks J. When Can Odds Ratios Mislead?: Odds Ratios Should Be Used Only in Case-Control Studies and Logistic Regression Analyses. *BMJ: BRITISH MEDICAL JOURNAL*. 1998;317(7166):1155.
14. Katz KA. The (Relative) Risks of Using Odds Ratios. *ARCHIVES OF DERMATOLOGY*. 2006;142(6):761-764.
15. Holcomb Jr WL, Chaiworapongsa T, Luke DA, Burgdorf KD. An Odd Measure of Risk: Use and Misuse of the Odds Ratio. *OBSTETRICS & GYNECOLOGY*. 2001;98(4):685-688.
16. Grimes DA, Schulz KF. Making Sense of Odds and Odds Ratios. *OBSTETRICS & GYNECOLOGY*. 2008;111(2):423-426.
17. Guyatt GH, Sackett DL, Sinclair JC, et al. Users' Guides to the Medical Literature: Ix. A Method for Grading Health Care Recommendations. *JAMA*. 1995;274(22):1800-1804.
18. Greenland S. Interpretation and Choice of Effect Measures in Epidemiologic Analyses. *AMERICAN JOURNAL OF EPIDEMIOLOGY*. 1987;125(5):761-768.
19. Greenland S, Robins JM, Pearl J. Confounding and Collapsibility in Causal Inference. *STATISTICAL SCIENCE*. 1999:29-46.



20. Greenland S, Morgenstern H. Confounding in Health Research. *ANNUAL REVIEW OF PUBLIC HEALTH*. 2001;22(1):189-212.
21. Samuels ML. Matching and Design Efficiency in Epidemiological Studies. *BIOMETRIKA*. 1981;68(3):577-588.
22. Pang M, Kaufman JS, Platt RW. Studying Noncollapsibility of the Odds Ratio with Marginal Structural and Logistic Regression Models. *STATISTICAL METHODS IN MEDICAL RESEARCH*. 2016;25(5):1925-1937.
23. Hernán MA, Hernández-Díaz S, Werler MM, Mitchell AA. Causal Knowledge as a Prerequisite for Confounding Evaluation: An Application to Birth Defects Epidemiology. *AMERICAN JOURNAL OF EPIDEMIOLOGY*. 2002;155(2):176-184.
24. Samuels ML. Simpson's Paradox and Related Phenomena. *JOURNAL OF THE AMERICAN STATISTICAL ASSOCIATION*. 1993;88(421):81-88.
25. Norton EC. *Log Odds and Ends*. National Bureau of Economic Research;2012. 0898-2937.
26. Burgess S. Estimating and Contextualizing the Attenuation of Odds Ratios Due to Non Collapsibility. *COMMUNICATIONS IN STATISTICS-THEORY AND METHODS*. 2017;46(2):786-804.
27. Persson E, Waernbaum I. Estimating a Marginal Causal Odds Ratio in a Case-Control Design: Analyzing the Effect of Low Birth Weight on the Risk of Type 1 Diabetes Mellitus. *STATISTICS IN MEDICINE*. 2013;32(14):2500-2512.
28. Wermuth N. Parametric Collapsibility and the Lack of Moderating Effects in Contingency Tables with a Dichotomous Response Variable. *JOURNAL OF THE ROYAL STATISTICAL SOCIETY: SERIES B (METHODOLOGICAL)*. 1987;49(3):353-364.
29. Hernán MA, Clayton D, Keiding N. The Simpson's Paradox Unraveled. *INTERNATIONAL JOURNAL OF EPIDEMIOLOGY*. 2011;40(3):780-785.
30. Brand R, Kragt H. Importance of Trends in the Interpretation of an Overall Odds Ratio in the Meta-Analysis of Clinical Trials. *STATISTICS IN MEDICINE*. 1992;11(16):2077-2082.
31. Thompson SG. Systematic Review: Why Sources of Heterogeneity in Meta-Analysis Should Be Investigated. *BMJ*. 1994;309(6965):1351.
32. Schmid CH, Lau J, McIntosh MW, Cappelleri JC. An Empirical Study of the Effect of the Control Rate as a Predictor of Treatment Efficacy in Meta-Analysis of Clinical Trials. *STATISTICS IN MEDICINE*. 1998;17(17):1923-1942.
33. Walter SD. Variation in Baseline Risk as an Explanation of Heterogeneity in Meta-Analysis. *STATISTICS IN MEDICINE*. 1997;16(24):2883-2900.
34. Smith GD, Song F, Sheldon TA. Cholesterol Lowering and Mortality: The Importance of Considering Initial Level of Risk. *BRITISH MEDICAL JOURNAL*. 1993;306(6889):1367-1373.
35. Hulley SB, Newman TB, Grady D, Garber AM, Baron RB, Browner WS. Should We Be Measuring Blood Cholesterol Levels in Young Adults? *JAMA*. 1993;269(11):1416-1419.
36. McINTOSH MW. The Population Risk as an Explanatory Variable in Research Synthesis of Clinical Trials. *STATISTICS IN MEDICINE*. 1996;15(16):1713-1728.
37. Horwitz RI. "Large-Scale Randomized Evidence: Large, Simple Trials and Overviews of Trials": Discussion. A Clinician's Perspective on Meta-Analyses. *JOURNAL OF CLINICAL EPIDEMIOLOGY*. 1995;48(1):41-44.
38. Cummings P. The Relative Merits of Risk Ratios and Odds Ratios. *ARCHIVES OF PEDIATRICS & ADOLESCENT MEDICINE*. 2009;163(5):438-445.



39. Hauck WW, Anderson S, Marcus SM. Should We Adjust for Covariates in Nonlinear Regression Analyses of Randomized Trials? *CONTROLLED CLINICAL TRIALS*. 1998;19(3):249-256.
40. Knol MJ, Duijnhoven RG, Grobbee DE, Moons KG, Groenwold RH. Potential Misinterpretation of Treatment Effects Due to Use of Odds Ratios and Logistic Regression in Randomized Controlled Trials. *PLOS ONE*. 2011;6(6):e21248.
41. Fleiss JL, Levin B, Paik MC. *Statistical Methods for Rates and Proportions*. John Wiley & Sons; 2013.
42. Weber F, Knapp G, Ickstadt K, Kundt G, Glass Ä. Zero-Cell Corrections in Random-Effects Meta-Analyses. *RESEARCH SYNTHESIS METHODS*. 2020.
43. Hinkle DE. *Applied Statistics for the Behavioral Sciences*. 2nd ed.. ed. Boston: Boston : Houghton Mifflin; 1988.
44. Lau J, Ioannidis JP, Schmid CH. Summing up Evidence: One Answer Is Not Always Enough. *THE LANCET*. 1998;351(9096):123-127.
45. Weiss CO, Segal JB, Varadhan R. Assessing the Applicability of Trial Evidence to a Target Sample in the Presence of Heterogeneity of Treatment Effect. *PHARMACOEPIDEMIOLOGY AND DRUG SAFETY*. 2012;21(S2):121-129.
46. Sharp SJ, Thompson SG, Altman DG. The Relation between Treatment Benefit and Underlying Risk in Meta-Analysis. *BMJ*. 1996;313(7059):735-738.
47. Sutton AJ, Higgins JP. Recent Developments in Meta-Analysis. *STATISTICS IN MEDICINE*. 2008;27(5):625-650.
48. Senn S, Brand R. Importance of Trends in the Interpretation of an Overall Odds Ratio in the Meta-Analysis of Clinical Trials. *STATISTICS IN MEDICINE*. 1994/02/15 1994;13(3):293-296.
49. Schmid CH, Stijnen T, White I. *Handbook of Meta-Analysis*. CRC Press; 2020.
50. Thompson SG, Smith TC, Sharp SJ. Investigating Underlying Risk as a Source of Heterogeneity in Meta-Analysis. *STATISTICS IN MEDICINE*. 1997/12/15 1997;16(23):2741-2758.
51. Chu H, Nie L, Chen Y, Huang Y, Sun W. Bivariate Random Effects Models for Meta-Analysis of Comparative Studies with Binary Outcomes: Methods for the Absolute Risk Difference and Relative Risk. *STATISTICAL METHODS IN MEDICAL RESEARCH*. 2012;21(6):621-633.
52. Zeger SL, Liang K-Y, Albert PS. Models for Longitudinal Data: A Generalized Estimating Equation Approach. *BIOMETRICS*. 1988:1049-1060.
53. Ma X, Nie L, Cole SR, Chu H. Statistical Methods for Multivariate Meta-Analysis of Diagnostic Tests: An Overview and Tutorial. *STATISTICAL METHODS IN MEDICAL RESEARCH*. 2016;25(4):1596-1619.
54. Derry CJ, Derry S, Moore RA. Sumatriptan (Oral Route of Administration) for Acute Migraine Attacks in Adults. *COCHRANE DATABASE OF SYSTEMATIC REVIEWS*. 2012(2).
55. Viechtbauer W. Conducting Meta-Analyses in R with the Metafor Package. *JOURNAL OF STATISTICAL SOFTWARE*. 2010;36(3):1-48.
56. Bonett DG, Wright TA. Sample Size Requirements for Estimating Pearson, Kendall and Spearman Correlations. *PSYCHOMETRIKA*. 2000;65(1):23-28.

Table 1: An illustration example to demonstrate the collapsibility of the RD and RR, and noncollapsibility of OR between outcome (Y), treatment (X) and strata (Z).

**A. The crude RD equals to a constant stratum-specific RD value**

|      | Z=1  |      | Z=0  |      | Crude |      |
|------|------|------|------|------|-------|------|
|      | X=1  | X=0  | X=1  | X=0  | X=1   | X=0  |
| Y=1  | 80   | 60   | 40   | 20   | 120   | 80   |
| Y=0  | 20   | 40   | 60   | 80   | 80    | 120  |
| Risk | 0.80 | 0.60 | 0.40 | 0.20 | 0.60  | 0.40 |
| RD   | 0.20 |      | 0.20 |      | 0.20  |      |
| RR   | 1.33 |      | 2.00 |      | 1.50* |      |
| OR   | 2.67 |      | 2.67 |      | 2.25  |      |

\*: RR varies across the two strata, but it can still be collapsible across Z as it can be computed as the ratio of weighted averaged risks, i.e.,  $RR_{crude} = \frac{\text{averaged risk}_{X=1}}{\text{averaged risk}_{X=0}} = \frac{\text{risk}_{X=1,Z=1}P(Z=1|X=1) + \text{risk}_{X=1,Z=0}P(Z=0|X=1)}{\text{risk}_{X=0,Z=1}P(Z=1|X=0) + \text{risk}_{X=0,Z=0}P(Z=0|X=0)} = \frac{0.8 \cdot 0.5 + 0.4 \cdot 0.5}{0.6 \cdot 0.5 + 0.2 \cdot 0.5} = 1.50$ . RD: risk difference; RR: relative risks; OR: odds ratio.

**B. The crude RR equals to a constant stratum-specific RR value**

|      | Z=1  |      | Z=0  |      | Crude |      |
|------|------|------|------|------|-------|------|
|      | X=1  | X=0  | X=1  | X=0  | X=1   | X=0  |
| Y=1  | 60   | 30   | 40   | 20   | 100   | 50   |
| Y=0  | 40   | 70   | 60   | 80   | 100   | 150  |
| Risk | 0.60 | 0.30 | 0.40 | 0.20 | 0.50  | 0.25 |
| RD   | 0.30 |      | 0.20 |      | 0.25* |      |
| RR   | 2.00 |      | 2.00 |      | 2.00  |      |
| OR   | 3.50 |      | 2.67 |      | 3.00  |      |

\*: RD can still be collapsible from different stratum-specific values in Table 1B by being the difference of weighted averaged risks, i.e.,  $RD_{crude} = \text{averaged risk}_{X=1} - \text{averaged risk}_{X=0} = (\text{risk}_{X=1,Z=1}P(Z=1|X=1) + \text{risk}_{X=1,Z=0}P(Z=0|X=1)) - (\text{risk}_{X=0,Z=1}P(Z=1|X=0) + \text{risk}_{X=0,Z=0}P(Z=0|X=0)) = (0.6 \cdot 0.5 + 0.4 \cdot 0.5) - (0.3 \cdot 0.5 + 0.2 \cdot 0.5) = 0.25$ . On the contrary, OR is still not collapsible across Z because  $\frac{\text{averaged odds}_{X=1}}{\text{averaged odds}_{X=0}} = \frac{\text{odds}_{X=1,Z=1}P(Z=1|X=1) + \text{odds}_{X=1,Z=0}P(Z=0|X=1)}{\text{odds}_{X=0,Z=1}P(Z=1|X=0) + \text{odds}_{X=0,Z=0}P(Z=0|X=0)} = \frac{\frac{0.6}{1-0.6} \cdot 0.5 + \frac{0.4}{1-0.4} \cdot 0.5}{\frac{0.3}{1-0.3} \cdot 0.5 + \frac{0.2}{1-0.2} \cdot 0.5} = 3.19 \neq OR_{marginal} = 3.0$ . RD: risk difference; RR: relative risks; OR: odds ratio.

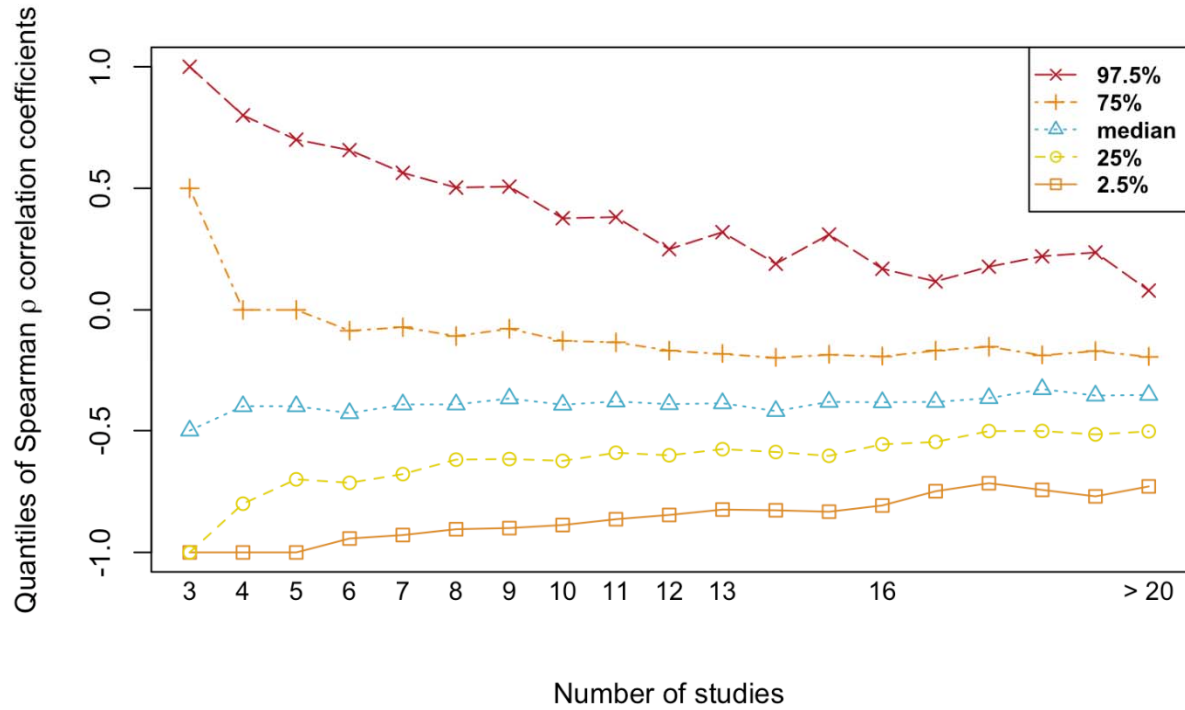

Figure 1: Quantiles of the Spearman's rank correlation coefficient  $\rho$  between the odds ratio and baseline risk among meta-analyses, stratified by number of studies in a meta-analysis.

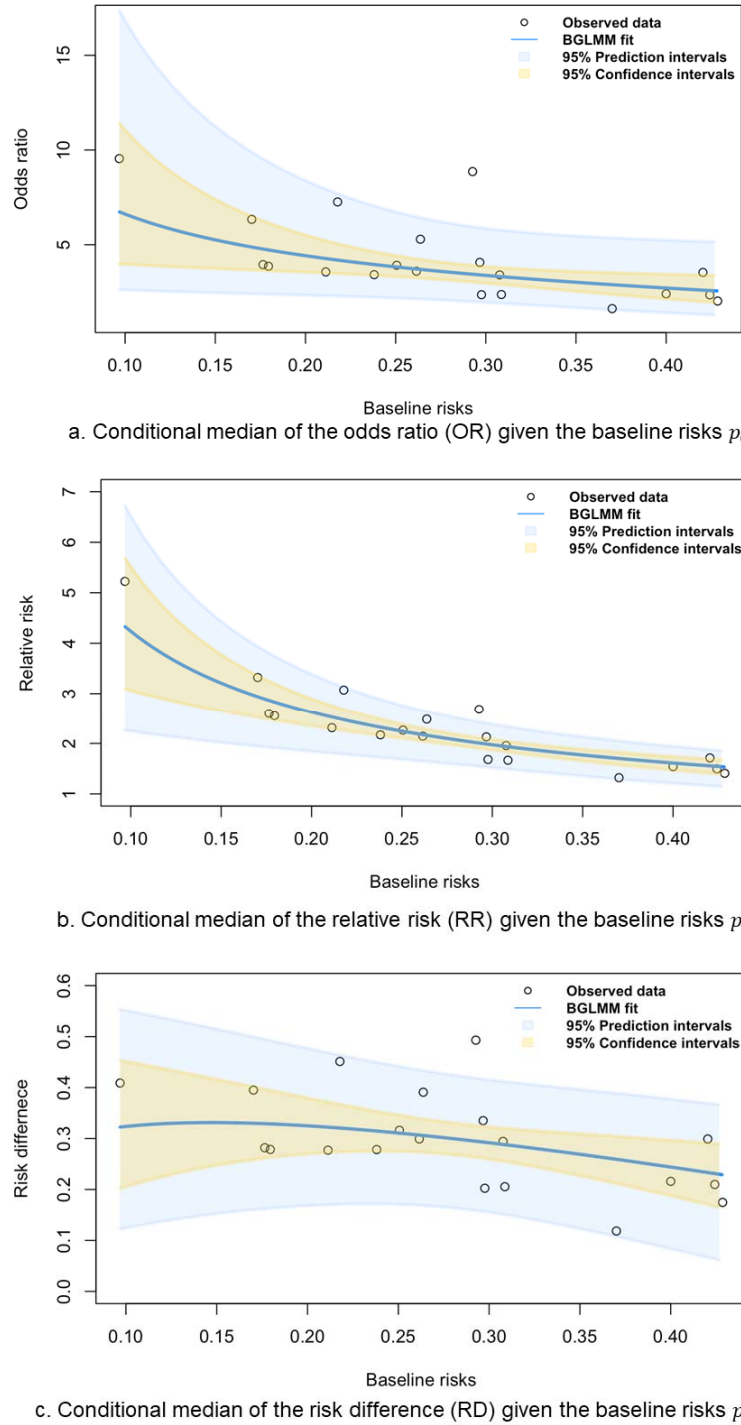

Figure 2: Plot of the observed OR, RR, and RD versus the nonlinear fit from BGLMM with varying levels of baseline risks; BGLMM: bivariate generalized linear mixed-effects model; OR: odds ratio; RD, risk difference; RD, relative risk.
